# Supplementary material
Source: ML conference proceedings conference paper supplement (https://proceedings.neurips.cc/paper_files/paper/2019/hash/8a1ee9f2b7abe6e88d1a479ab6a42c5e-Abstract.html)
Supplement: Supplementary file [file 8a1ee9f2b7abe6e88d1a479ab6a42c5e-Supplemental.zip]

## A Training Process

---

**Algorithm 1** The training process with  $\mathcal{L}_{\text{DMI}}$

---

**Require:** A training dataset  $\mathcal{D} = \{(x_i, \tilde{y}_i)\}_{i=1}^D$ , a validation dataset  $\mathcal{V} = \{(x_i, \tilde{y}_i)\}_{i=1}^V$ , a classifier modeled by deep neural network  $h_\Theta$ , the running epoch number  $T$ , the learning rate  $\gamma$  and the batch size  $N$ .

- 1: Pretrain the classifier  $h_\Theta$  on the dataset  $\mathcal{D}$  with cross entropy loss
  - 2: Initialize the best classifier:  $h_{\Theta^*} \leftarrow h_\Theta$
  - 3: Randomly sample a batch of samples  $\mathcal{B}_v = \{(x_i, \tilde{y}_i)\}_{i=1}^N$  from the validation dataset
  - 4: Initialize the minimum validation loss:  $L^* \leftarrow \mathcal{L}_{\text{DMI}}(\mathcal{B}_v; h_\Theta)$
  - 5: **for** epoch  $t = 1 \rightarrow T$  **do**
  - 6:   **for** batch  $b = 1 \rightarrow \lceil D/B \rceil$  **do**
  - 7:     Randomly sample a batch of samples  $\mathcal{B}_t = \{(x_i, \tilde{y}_i)\}_{i=1}^N$  from the training dataset
  - 8:     Compute the training loss:  $L \leftarrow \mathcal{L}_{\text{DMI}}(\mathcal{B}_t; h_\Theta)$
  - 9:     Update  $\Theta$ :  $\Theta \leftarrow \Theta - \gamma \frac{\partial L}{\partial \Theta}$
  - 10:   **end for**
  - 11:   Randomly sample a batch of samples  $\mathcal{B}_v = \{(x_i, \tilde{y}_i)\}_{i=1}^N$  from the validation dataset
  - 12:   Compute the validation loss:  $L \leftarrow \mathcal{L}_{\text{DMI}}(\mathcal{B}_v; h_\Theta)$
  - 13:   **if**  $L < L^*$  **then**
  - 14:     Update the minimum validation loss:  $L^* \leftarrow L$
  - 15:     Update the best classifier:  $h_{\Theta^*} \leftarrow h_\Theta$
  - 16:   **end if**
  - 17: **end for**
  - 18: **return** the best classifier  $h_{\Theta^*}$
- 

## B Other Proofs

**Claim B.1.**

$$\mathbb{E} \mathbf{U}_{c\tilde{c}} = \Pr[h(X) = c, \tilde{Y} = \tilde{c}]$$

where

$$\mathbf{U}_{c\tilde{c}} := \frac{1}{N} \sum_{i=1}^N \mathbf{O}_{ci} \mathbf{L}_{i\tilde{c}} = \frac{1}{N} \sum_{i=1}^N h(x_i)_c \mathbb{1}[\tilde{y}_i = \tilde{c}].$$

*Proof.* Recall that the randomness of  $h(X)$  comes from both  $h$  and  $X$  and the randomness of  $h$  is independent of everything else.

$$\begin{aligned}
\mathbb{E} \mathbf{U}_{c\tilde{c}} &= \mathbb{E} \frac{1}{N} \sum_{i=1}^N h(x_i)_c \mathbb{1}[\tilde{y}_i = \tilde{c}] \\
&= \mathbb{E}_{X, \tilde{Y}} h(X)_c \mathbb{1}[\tilde{Y} = \tilde{c}] && \text{(i.i.d. samples)} \\
&= \sum_{x, \tilde{y}} \Pr[X = x, \tilde{Y} = \tilde{y}] h(x)_c \mathbb{1}[\tilde{y} = \tilde{c}] \\
&= \sum_x \Pr[X = x, \tilde{Y} = \tilde{c}] h(x)_c \\
&= \sum_x \Pr[X = x, \tilde{Y} = \tilde{c}] \Pr[h(X) = c | X = x] && \text{(definition of randomized classifier)} \\
&= \sum_x \Pr[X = x, \tilde{Y} = \tilde{c}] \Pr[h(X) = c | X = x, \tilde{Y} = \tilde{c}] \\
&\quad \text{(fixing } x, \text{ the randomness of } h \text{ is independent of everything else)} \\
&= \Pr[h(X) = c, \tilde{Y} = \tilde{c}].
\end{aligned}$$

□

**Claim B.2.** Under the the performance measure based on Shannon mutual information, the measurement based on noisy labels  $MI(h(X), \tilde{Y})$  is not consistent with the measurement based on true labels  $MI(h(X), Y)$ . i.e., for every two classifiers  $h$  and  $h'$ ,

$$I(h(X), Y) > I(h'(X), Y) \not\Rightarrow I(h(X), \tilde{Y}) > I(h'(X), \tilde{Y}).$$

*Proof.* See a counterexample:

The matrix format of the joint distribution  $Q_{h(X), Y}$  is  $\mathbf{Q}_{h(X), Y} = \begin{bmatrix} 0.1 & 0.4 \\ 0.2 & 0.3 \end{bmatrix}$ , the matrix format of the joint distribution  $Q_{h'(X), Y}$  is  $\mathbf{Q}_{h'(X), Y} = \begin{bmatrix} 0.2 & 0.6 \\ 0.1 & 0.1 \end{bmatrix}$  and the noise transition matrix is  $\mathbf{T}_{Y \rightarrow \tilde{Y}} = \begin{bmatrix} 0.8 & 0.2 \\ 0.4 & 0.6 \end{bmatrix}$ .

Given these conditions,  $\mathbf{Q}_{h(X), \tilde{Y}} = \begin{bmatrix} 0.24 & 0.26 \\ 0.28 & 0.22 \end{bmatrix}$  and  $\mathbf{Q}_{h'(X), \tilde{Y}} = \begin{bmatrix} 0.40 & 0.40 \\ 0.12 & 0.08 \end{bmatrix}$ .

If we use Shannon mutual information as the performance measure,

$$MI(h(X), Y) = 2.4157 \times 10^{-2},$$

$$MI(h'(X), Y) = 2.2367 \times 10^{-2},$$

$$MI(h(X), \tilde{Y}) = 3.2085 \times 10^{-3},$$

$$MI(h'(X), \tilde{Y}) = 3.2268 \times 10^{-3}.$$

Thus we have  $MI(h(X), Y) > MI(h'(X), Y)$  but  $MI(h(X), \tilde{Y}) < MI(h'(X), \tilde{Y})$ .

Therefore,  $MI(h(X), Y) > MI(h'(X), Y) \not\Rightarrow MI(h(X), \tilde{Y}) > MI(h'(X), \tilde{Y})$ .

□

## C Noise Transition Matrices

Here we list the explicit noise transition matrices.

On Fashion-MNIST, case (1):  $\mathbf{T}_{Y \rightarrow \tilde{Y}} = \begin{bmatrix} 1 - \frac{r}{2} & \frac{r}{2} \\ \frac{r}{2} & 1 - \frac{r}{2} \end{bmatrix}$ ;

On Fashion-MNIST, case (2):  $\mathbf{T}_{Y \rightarrow \tilde{Y}} = \begin{bmatrix} 1 - r & r \\ 0 & 1 \end{bmatrix}$ ;

On Fashion-MNIST, case (3):  $\mathbf{T}_{Y \rightarrow \tilde{Y}} = \begin{bmatrix} 1 & 0 \\ r & 1 - r \end{bmatrix}$ ;

On CIFAR-10,  $\mathbf{T}_{Y \rightarrow \tilde{Y}} = \begin{bmatrix} 1 & 0 & 0 & 0 & 0 & 0 & 0 & 0 & 0 & 0 \\ 0 & 1 & 0 & 0 & 0 & 0 & 0 & 0 & 0 & 0 \\ r & 0 & 1 - r & 0 & 0 & 0 & 0 & 0 & 0 & 0 \\ 0 & 0 & 0 & 1 - r & 0 & r & 0 & 0 & 0 & 0 \\ 0 & 0 & 0 & 0 & 1 - r & 0 & 0 & r & 0 & 0 \\ 0 & 0 & 0 & 0 & 0 & 1 & 0 & 0 & 0 & 0 \\ 0 & 0 & 0 & 0 & 0 & 0 & 1 & 0 & 0 & 0 \\ 0 & 0 & 0 & 0 & 0 & 0 & 0 & 1 & 0 & 0 \\ 0 & 0 & 0 & 0 & 0 & 0 & 0 & 0 & 1 & 0 \\ 0 & r & 0 & 0 & 0 & 0 & 0 & 0 & 0 & 1 - r \end{bmatrix}$ ;

On Dogs vs. Cats,  $\mathbf{T}_{Y \rightarrow \tilde{Y}} = \begin{bmatrix} 1 & 0 \\ r & 1 - r \end{bmatrix}$ .

On MR,  $\mathbf{T}_{Y \rightarrow \tilde{Y}} = \begin{bmatrix} 1 & 0 \\ r & 1 - r \end{bmatrix}$ .

For Fashion-MNIST case (1),  $r = 0.0, 0.1, 0.2, 0.3, 0.4, 0.5, 0.6, 0.7, 0.8, 0.9$  are diagonally dominant noises. For other cases,  $r = 0.0, 0.1, 0.2, 0.3, 0.4$  are diagonally dominant noises and  $r = 0.5, 0.6, 0.7, 0.8, 0.9$  are diagonally non-dominant noises.

## D Additional Experiments

For clean presentation, we only include the comparison between **CE** and **DMI** in section 5.1 and attach comparisons with other methods here. In the experiments in section 5.2, noise patterns are divided into two main cases, diagonally dominant and diagonally non-dominant and uniform noise is a special case of diagonally dominant noise. Thus, we did not emphasize the uniform noise results in section 5.2 and attach them here.

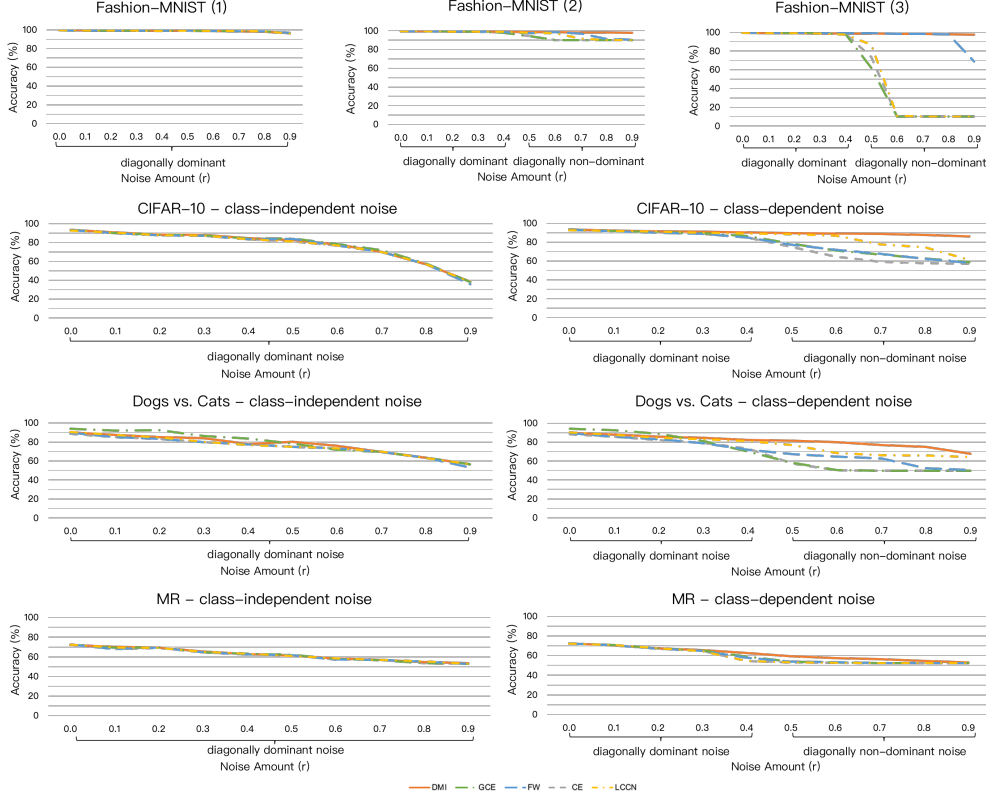

Figure 4: Additional experiments

We also compared our method to **MentorNet** (the sample reweighting loss [14]) and **VAT** (the regularization loss [25]). For clean presentation, we only attach them here. Our method still outperforms these two additional baselines in most of the cases.<sup>4</sup>

Table 2: Test accuracy on CIFAR-10 (mean  $\pm$  std. dev.)

| $r$ | CE               | MentorNet        | VAT              | FW               | GCE                                | LCCN             | DMI                                |
|-----|------------------|------------------|------------------|------------------|------------------------------------|------------------|------------------------------------|
| 0.0 | 93.29 $\pm$ 0.18 | 92.13 $\pm$ 1.22 | 92.25 $\pm$ 0.1  | 93.12 $\pm$ 0.16 | <b>93.43 <math>\pm</math> 0.24</b> | 92.47 $\pm$ 0.36 | 93.37 $\pm$ 0.20                   |
| 0.1 | 91.63 $\pm$ 0.32 | 91.35 $\pm$ 0.83 | 91.4 $\pm$ 0.68  | 91.54 $\pm$ 0.15 | 91.96 $\pm$ 0.09                   | 91.88 $\pm$ 0.23 | <b>92.08 <math>\pm</math> 0.08</b> |
| 0.2 | 90.36 $\pm$ 0.24 | 90.06 $\pm$ 0.52 | 91.19 $\pm$ 0.31 | 90.10 $\pm$ 0.22 | 90.87 $\pm$ 0.16                   | 91.05 $\pm$ 0.43 | <b>91.51 <math>\pm</math> 0.17</b> |
| 0.3 | 88.79 $\pm$ 0.40 | 88.47 $\pm$ 0.61 | 88.97 $\pm$ 0.41 | 88.77 $\pm$ 0.36 | 89.67 $\pm$ 0.21                   | 89.88 $\pm$ 0.40 | <b>91.12 <math>\pm</math> 0.30</b> |
| 0.4 | 84.76 $\pm$ 0.98 | 84.12 $\pm$ 1.29 | 84.09 $\pm$ 0.46 | 84.78 $\pm$ 1.53 | 86.6 $\pm$ 0.47                    | 89.33 $\pm$ 0.58 | <b>90.41 <math>\pm</math> 0.32</b> |
| 0.5 | 74.81 $\pm$ 3.37 | 78.43 $\pm$ 0.39 | 75.07 $\pm$ 0.66 | 77.2 $\pm$ 4.19  | 78.53 $\pm$ 1.93                   | 88.30 $\pm$ 0.38 | <b>89.45 <math>\pm</math> 0.99</b> |
| 0.6 | 64.61 $\pm$ 0.72 | 71.33 $\pm$ 0.13 | 65.02 $\pm$ 0.63 | 71.98 $\pm$ 1.83 | 71.14 $\pm$ 0.78                   | 86.89 $\pm$ 0.51 | <b>89.03 <math>\pm</math> 0.69</b> |
| 0.7 | 59.15 $\pm$ 0.64 | 66.28 $\pm$ 0.76 | 58.92 $\pm$ 1.49 | 67.59 $\pm$ 1.64 | 67.10 $\pm$ 0.82                   | 77.50 $\pm$ 0.60 | <b>88.82 <math>\pm</math> 0.89</b> |
| 0.8 | 57.65 $\pm$ 0.28 | 65.67 $\pm$ 0.57 | 57.78 $\pm$ 0.32 | 62.22 $\pm$ 1.80 | 62.56 $\pm$ 0.72                   | 74.62 $\pm$ 1.16 | <b>87.46 <math>\pm</math> 0.79</b> |
| 0.9 | 57.46 $\pm$ 0.08 | 59.49 $\pm$ 0.40 | 57.19 $\pm$ 1.25 | 58.23 $\pm$ 0.25 | 58.91 $\pm$ 0.46                   | 61.32 $\pm$ 1.87 | <b>85.94 <math>\pm</math> 0.74</b> |

<sup>4</sup>VAT can not be applied to MR dataset.

Table 3: Test accuracy on Dogs vs. Cats (mean  $\pm$  std. dev.)

| $r$ | CE               | MentorNet        | VAT              | FW               | GCE                                | LCCN             | DMI                                |
|-----|------------------|------------------|------------------|------------------|------------------------------------|------------------|------------------------------------|
| 0.0 | 88.50 $\pm$ 0.60 | 88.76 $\pm$ 0.32 | 88.32 $\pm$ 0.76 | 89.66 $\pm$ 0.63 | <b>94.06 <math>\pm</math> 0.41</b> | 90.41 $\pm$ 0.38 | 90.21 $\pm$ 0.27                   |
| 0.1 | 85.87 $\pm$ 0.79 | 87.33 $\pm$ 0.51 | 87.04 $\pm$ 1.53 | 85.87 $\pm$ 0.54 | <b>92.75 <math>\pm</math> 0.50</b> | 87.72 $\pm$ 0.46 | 87.99 $\pm$ 0.41                   |
| 0.2 | 82.50 $\pm$ 0.96 | 82.08 $\pm$ 0.60 | 82.36 $\pm$ 0.78 | 83.20 $\pm$ 0.83 | <b>88.94 <math>\pm</math> 0.70</b> | 84.80 $\pm$ 0.93 | 85.88 $\pm$ 0.83                   |
| 0.3 | 79.11 $\pm$ 1.08 | 80.14 $\pm$ 0.99 | 78.55 $\pm$ 0.76 | 78.71 $\pm$ 1.97 | 81.34 $\pm$ 3.23                   | 83.16 $\pm$ 1.18 | <b>84.61 <math>\pm</math> 0.98</b> |
| 0.4 | 73.05 $\pm$ 0.20 | 72.24 $\pm$ 0.75 | 74.72 $\pm$ 0.57 | 72.13 $\pm$ 2.42 | 70.13 $\pm$ 3.59                   | 81.06 $\pm$ 1.05 | <b>82.52 <math>\pm</math> 1.01</b> |
| 0.5 | 57.46 $\pm$ 3.71 | 63.62 $\pm$ 0.39 | 66.83 $\pm$ 0.75 | 67.50 $\pm$ 3.99 | 58.31 $\pm$ 1.19                   | 76.88 $\pm$ 2.97 | <b>81.50 <math>\pm</math> 1.19</b> |
| 0.6 | 49.98 $\pm$ 0.15 | 63.07 $\pm$ 0.93 | 55.02 $\pm$ 1.41 | 64.58 $\pm$ 5.21 | 50.39 $\pm$ 0.47                   | 68.50 $\pm$ 3.40 | <b>80.00 <math>\pm</math> 0.72</b> |
| 0.7 | 49.83 $\pm$ 0.09 | 52.38 $\pm$ 0.66 | 54.18 $\pm$ 0.72 | 62.87 $\pm$ 6.82 | 49.76 $\pm$ 0.00                   | 66.10 $\pm$ 2.45 | <b>77.01 <math>\pm</math> 1.07</b> |
| 0.8 | 49.80 $\pm$ 0.03 | 51.42 $\pm$ 0.75 | 51.88 $\pm$ 0.25 | 52.44 $\pm$ 1.52 | 49.76 $\pm$ 0.00                   | 65.93 $\pm$ 2.76 | <b>75.01 <math>\pm</math> 0.88</b> |
| 0.9 | 49.77 $\pm$ 0.01 | 51.31 $\pm$ 0.20 | 51.69 $\pm$ 0.70 | 50.56 $\pm$ 1.32 | 49.76 $\pm$ 0.00                   | 64.29 $\pm$ 1.46 | <b>67.96 <math>\pm</math> 1.45</b> |

Table 4: Test accuracy on MR (mean  $\pm$  std. dev.)

| $r$ | CE               | MentorNet                          | FW               | GCE                                | LCCN             | DMI                                |
|-----|------------------|------------------------------------|------------------|------------------------------------|------------------|------------------------------------|
| 0.0 | 72.35 $\pm$ 0.00 | <b>72.44 <math>\pm</math> 0.32</b> | 72.35 $\pm$ 0.00 | 72.24 $\pm$ 0.10                   | 72.35 $\pm$ 0.00 | 72.07 $\pm$ 0.00                   |
| 0.1 | 70.51 $\pm$ 0.97 | 69.54 $\pm$ 0.19                   | 70.49 $\pm$ 0.94 | <b>70.58 <math>\pm</math> 1.03</b> | 70.72 $\pm$ 1.02 | 70.42 $\pm$ 0.73                   |
| 0.2 | 67.12 $\pm$ 1.19 | 66.72 $\pm$ 0.98                   | 67.14 $\pm$ 1.21 | <b>67.48 <math>\pm</math> 1.02</b> | 67.33 $\pm$ 1.61 | 67.44 $\pm$ 1.22                   |
| 0.3 | 64.68 $\pm$ 1.22 | 65.13 $\pm$ 0.13                   | 64.92 $\pm$ 1.37 | 65.19 $\pm$ 1.09                   | 64.65 $\pm$ 1.58 | <b>65.62 <math>\pm</math> 1.04</b> |
| 0.4 | 54.52 $\pm$ 1.74 | 54.73 $\pm$ 1.01                   | 57.89 $\pm$ 2.51 | 58.97 $\pm$ 1.77                   | 54.52 $\pm$ 1.74 | <b>62.67 <math>\pm</math> 2.27</b> |
| 0.5 | 53.08 $\pm$ 0.64 | 53.70 $\pm$ 0.55                   | 53.83 $\pm$ 0.68 | 53.81 $\pm$ 2.04                   | 53.08 $\pm$ 0.64 | <b>59.40 <math>\pm</math> 0.63</b> |
| 0.6 | 52.52 $\pm$ 0.57 | 53.15 $\pm$ 0.97                   | 53.58 $\pm$ 0.35 | 53.08 $\pm$ 1.46                   | 52.54 $\pm$ 0.59 | <b>57.38 <math>\pm</math> 0.81</b> |
| 0.7 | 52.28 $\pm$ 0.12 | 52.76 $\pm$ 0.98                   | 52.38 $\pm$ 0.19 | 52.22 $\pm$ 0.10                   | 52.29 $\pm$ 0.13 | <b>56.44 <math>\pm</math> 0.78</b> |
| 0.8 | 52.26 $\pm$ 0.08 | 52.29 $\pm$ 0.25                   | 52.24 $\pm$ 0.08 | 52.31 $\pm$ 0.15                   | 52.25 $\pm$ 0.08 | <b>54.69 <math>\pm</math> 0.65</b> |
| 0.9 | 52.20 $\pm$ 0.00 | 52.20 $\pm$ 0.56                   | 52.16 $\pm$ 0.14 | 52.20 $\pm$ 0.07                   | 52.20 $\pm$ 0.00 | <b>52.88 <math>\pm</math> 0.33</b> |

Table 5: Test accuracy (mean) on Clothing1M

| Method   | CE    | MentorNet | VAT   | FW    | GCE   | LCCN  | DMI          |
|----------|-------|-----------|-------|-------|-------|-------|--------------|
| Accuracy | 68.94 | 69.30     | 69.57 | 70.83 | 69.09 | 71.63 | <b>72.46</b> |
